# Supplementary material for: Changes in duodenal CD163-positive cells in dogs with chronic enteropathy after successful treatment
Source: PubMed Central journal article supplement — Innate Immun. 2018 Sep 17;24(7):400–10. doi: 10.1177/1753425918799865 (PMC6830873; doi:10.1177/1753425918799865), 2018-09-17
Supplement: Supplemental_material3.pdf [file Supplemental_material3.pdf]

Supplemental Material

Supplementary Fig 1

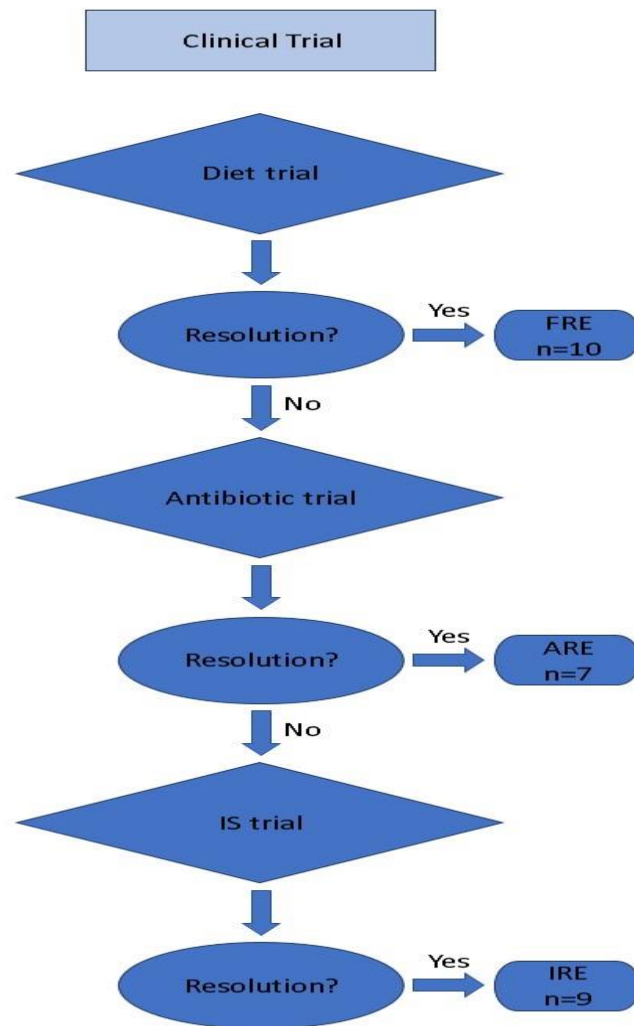

**Supplement 1:** Summary of clinical trial. ARE: antibiotic-responsive enteropathy. FRE: Food-responsive enteropathy. IRE: immunosuppressant-responsive enteropathy. IS: immunosuppressant trial. n: number of dogs.



**Supplement Fig 2.** Dot plots of calprotectin and CD163 labelling index in duodenal villi and crypts. ARE: Antibiotic responsive enteropathy. FRE: Food responsive enteropathy. IRE: Immune-suppressive responsive enteropathy. Normal: healthy dogs. pre: pre-treatment. post: post-treatment. Dots have been randomly jittered on the x-axis for presentation.

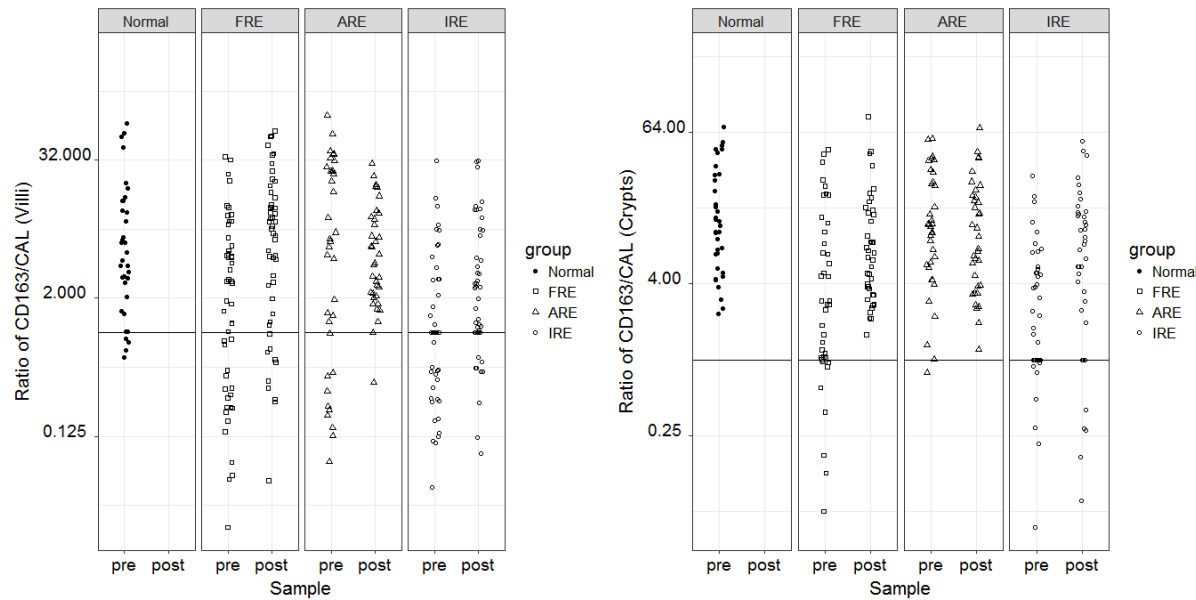

**Supplement fig 3.** Dot plots of the ratio of CD163 and calprotectin labelling index in duodenal villi and crypts. The horizontal line represents a ratio of 1. Ratios are presented on logged scales. CAL: calprotectin. ARE: Antibiotic responsive enteropathy. FRE: Food responsive enteropathy. IRE: Immune-suppressive responsive enteropathy. Normal: healthy dogs. pre: pre-treatment. post: post-treatment. Dots have been randomly jittered on the x-axis for presentation.

**Supplementary Table 1 : Dogs demographics.**

| Dog | Origin | Outcome | Age [mo] | Breed                      | Sex | CIBDAI- | CIBDAI- |
|-----|--------|---------|----------|----------------------------|-----|---------|---------|
|     |        |         |          |                            |     | 1       | 2       |
| 1   | MU     | ARE     | 26       | Labrador Retriever         | FS  | 4       | 0       |
| 2   | MU     | FRE     | 30       | Great Dane                 | MC  | 4       | 0       |
| 3   | MU     | FRE     | 29       | Staffordshire Bull Terrier | MC  | 11      | 0       |
| 4   | MU     | FRE     | 15       | GSD                        | M   | 3       | 0       |
| 5   | MU     | FRE     | 30       | Toy Poodle                 | MC  | 8       | 0       |
| 6   | UoM    | FRE     | 21       | Weimaraner                 | MC  | 4       | 0       |
| 7   | UoM    | ARE     | 18       | Japanese Spitz             | FS  | 7       | 1       |
| 8   | UoM    | ARE     | 44       | GSD                        | M   | 9       | 0       |
| 9   | UoM    | FRE     | 60       | Maltese cross              | FS  | 6       | 0       |
| 10  | UoM    | ARE     | 18       | GSD                        | FS  | 9       | 0       |
| 11  | UoM    | ARE     | 35       | Basset Hound               | M   | 5       | 0       |
| 12  | UoM    | ARE     | 60       | Border Collie              | MC  | 5       | 1       |
| 13  | UoM    | FRE     | 60       | Golden Retriever           | MC  | 6       | 0       |
| 14  | UoM    | IRE     | 60       | Spoodle                    | M   | 5       | 0       |
| 15  | UoM    | FRE     | 114      | Labrador Retriever         | FS  | 10      | 1       |
| 16  | UoM    | FRE     | 14       | GSD                        | FS  | 6       | 0       |
| 17  | UoM    | IRE     | 120      | Labrador Retriever         | FS  | 6       | 0       |
| 18  | UoM    | ARE     | 24       | Greyhound                  | FS  | 7       | 1       |
| 19  | UoM    | FRE     | 108      | Chihuahua                  | MC  | 6       | 0       |
| 20  | ISU    | IRE     | 120      | Pointer                    | M   | 8       | 0       |
| 21  | ISU    | IRE     | 18       | Cocker Spaniel             | FS  | 7       | 0       |
| 22  | ISU    | IRE     | 96       | Newfoundland               | MC  | 5       | 0       |
| 23  | ISU    | IRE     | 72       | GSP                        | FS  | 6       | 0       |

|    |     |     |     |                             |    |    |   |
|----|-----|-----|-----|-----------------------------|----|----|---|
| 24 | ISU | IRE | 48  | Great Swiss<br>Mountain Dog | MC | 11 | 0 |
| 25 | ISU | IRE | n/a | n/a                         | M  | 16 | 0 |
| 26 | ISU | IRE | 48  | GSD                         | FS | 5  | 0 |

### Origin

ISU Iowa State University  
 MU Murdoch University  
 UoM University of Melbourne

### Outcome

ARE Antibiotic-responsive enteropathy  
 FRE Food-responsive enteropathy  
 IRE Immunesuppressant-responsive  
 enteropathy

### Breed

GSD German Shepherd Dog  
 German Shorthaired  
 GSP Pointer

### Sex

F Female S Speyed  
 M Male C Castrated

**CIBDAI-1** Clinical Inflammatory Bowel Disease Activity Index before  
 treatment

**CIBDAI-2** Clinical Inflammatory Bowel Disease Activity Index after  
 treatment

n/a Not  
 available

**Supplement Table 2:** Least square-means and confidence interval for CD163 and calprotectin labelling index in duodenal villi (A) and crypts (B).  
 ARE: Antibiotic-responsive enteropathy. CI: Confidence interval. CTRL: Healthy dogs. FRE: Food responsive enteropathy. IRE: Immune-suppressive responsive enteropathy. Labelling index: the ratio number of positively stained cells / total number of cells × 100 per 10,000 square microns. n: number of dogs. PRE: Pre-treatment. POST: Post-treatment.

**A. Villi**

|      |      | <b>CD163</b> |                     |            | <b>CALPROTECTIN</b> |                     |            |
|------|------|--------------|---------------------|------------|---------------------|---------------------|------------|
|      |      | n            | Labelling index [%] | 95% CI     | n                   | Labelling index [%] | 95% CI     |
| CTRL |      | 7            | 4.53                | 2.69, 7.48 | 7                   | 0.74                | 0.30, 1.65 |
| FRE  | PRE  | 10           | 1.64                | 1.03, 2.57 | 10                  | 1.02                | 0.50, 1.95 |
|      | POST | 10           | 2.12                | 1.35, 3.31 | 10                  | 0.34                | 0.14, 0.72 |
| ARE  | PRE  | 7            | 2.01                | 1.16, 3.41 | 7                   | 0.43                | 0.15, 1.00 |
|      | POST | 7            | 1.54                | 0.88, 2.65 | 7                   | 0.27                | 0.07, 0.66 |
| IRE  | PRE  | 9            | 0.49                | 0.27, 0.83 | 9                   | 0.49                | 0.21, 1.03 |
|      | POST | 9            | 0.92                | 0.54, 1.51 | 9                   | 0.36                | 0.14, 0.78 |

**B. Crypts**

|      |      | <b>CD163</b> |                     |            | <b>CALPROTECTIN</b> |                     |            |
|------|------|--------------|---------------------|------------|---------------------|---------------------|------------|
|      |      | n            | Labelling index [%] | 95% CI     | n                   | Labelling index [%] | 95% CI     |
| CTRL |      | 7            | 4.63                | 2.75, 7.65 | 7                   | 0.28                | 0.13, 0.53 |
| FRE  | PRE  | 8            | 1.57                | 0.93, 2.61 | 8                   | 0.44                | 0.24, 0.75 |
|      | POST | 8            | 2.54                | 1.53, 4.15 | 8                   | 0.25                | 0.12, 0.46 |
| ARE  | PRE  | 7            | 2.57                | 1.50, 4.35 | 7                   | 0.16                | 0.06, 0.33 |
|      | POST | 7            | 2.36                | 1.37, 4.00 | 7                   | 0.15                | 0.05, 0.31 |
| IRE  | PRE  | 9            | 0.37                | 0.20, 0.64 | 9                   | 0.12                | 0.04, 0.25 |
|      | POST | 8            | 0.76                | 0.43, 1.28 | 8                   | 0.08                | 0.01, 0.18 |

**Supplement Table 3.** Least square-means and confidence interval for the ratio CD163/Calprotectin in duodenal villi and crypts. ARE: Antibiotic-responsive enteropathy. CAL: Calprotectin. CD163<sup>+</sup>/CAL<sup>+</sup> ratio: ratio CD163/Calprotectin. CI: Confidence interval. n: number of dogs. CTRL: Healthy dogs. FRE: Food responsive enteropathy. PRE: Pre-treatment. POST: Post-treatment. IRE: Immune-suppressive responsive enteropathy.

|      |      | VILLI |                                            |             | CRYPTS |                                            |             |
|------|------|-------|--------------------------------------------|-------------|--------|--------------------------------------------|-------------|
|      |      | n     | CD163 <sup>+</sup> /CAL <sup>+</sup> ratio | 95% CI      | n      | CD163 <sup>+</sup> /CAL <sup>+</sup> ratio | 95% CI      |
| CTRL |      | 7     | 5.51                                       | 2.32, 13.10 | 7      | 12.31                                      | 6.65, 22.81 |
| FRE  | PRE  | 10    | 1.56                                       | 0.76, 3.22  | 8      | 3.10                                       | 1.74, 5.52  |
|      | POST | 10    | 5.02                                       | 2.43, 10.35 | 8      | 7.45                                       | 4.19, 13.27 |
| ARE  | PRE  | 7     | 4.00                                       | 1.68, 9.51  | 7      | 10.27                                      | 5.54, 19.02 |
|      | POST | 7     | 4.49                                       | 1.89, 10.68 | 7      | 9.85                                       | 5.32, 18.25 |
| IRE  | PRE  | 9     | 0.99                                       | 0.46, 2.13  | 9      | 2.08                                       | 1.21, 3.59  |
|      | POST | 9     | 2.21                                       | 1.03, 4.74  | 8      | 4.82                                       | 2.74, 8.48  |

**Supplement Table 4.** Kendall's tau correlation coefficients for the labelling index for CD163, calprotectin, and ratio CD163:CAL with the histology score. CAL: calprotectin labelling index. CD163: CD163 labelling index. CD163:CAL: ratio of the labelling index of CD163 and calprotectin. Score: histology score.

|        |           |       |
|--------|-----------|-------|
| Villi  | CD163     | -0.15 |
|        | CAL       | 0.08  |
|        | CD163:CAL | -0.18 |
| Crypts | CD163     | -0.34 |

Correlation:

|          |                          |
|----------|--------------------------|
| High     | $P >  0.70 $             |
| Moderate | $ 0.50  > P \leq  0.70 $ |
| Low      | $ 0.30  > P \leq  0.50 $ |



|           |       |
|-----------|-------|
| CAL       | 0.03  |
| CD163:CAL | -0.23 |
| Score     | 1     |
|           | Score |

Weak  $P \leq |0.30|$
